# Supplementary material for: A Study of the Correlation between the Bulkiness of peri-Substituents and the Distortion of a Naphthalene Ring
Source: MDPI journal article supplement (doi:10.3390/molecules28145343), 2023-07-11
Supplement: s1 [file s1]

## Supplementary Materials

### 1,8-Dimethylnaphthalene (7)

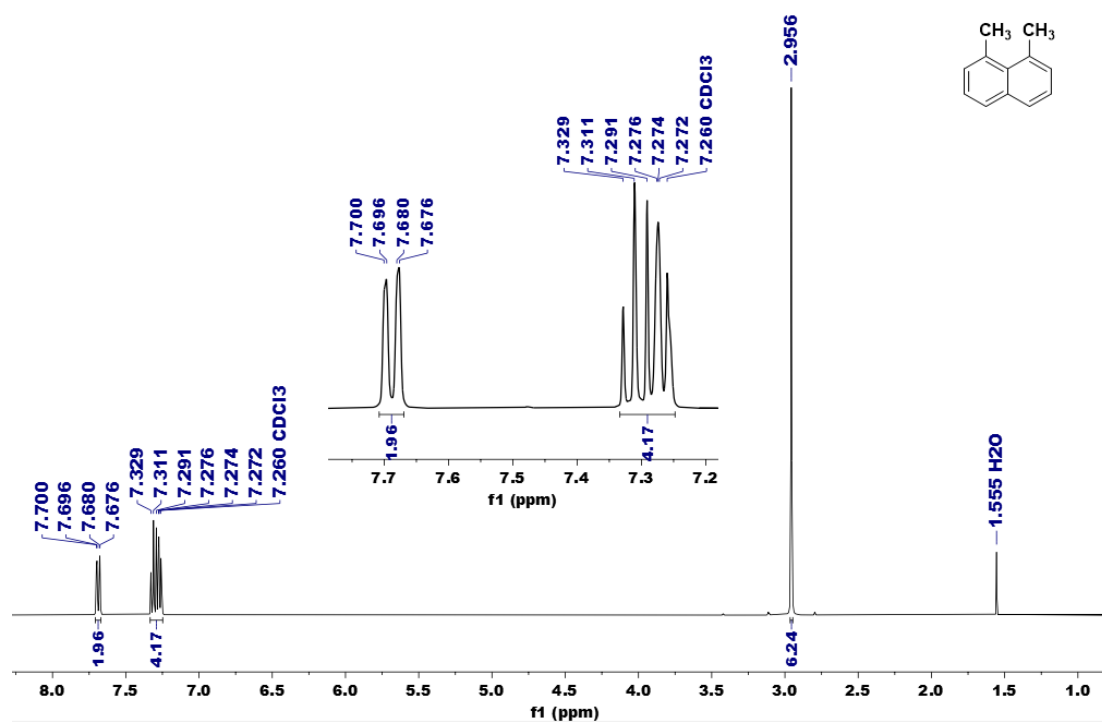

<sup>1</sup>H NMR (CDCl<sub>3</sub>, 400 MHz) of compound 7

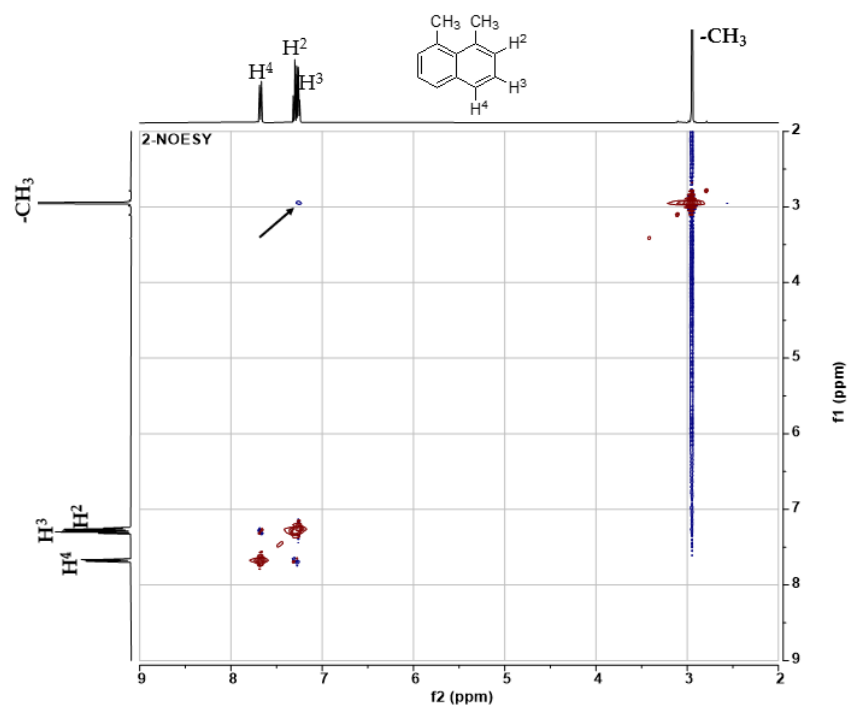

NOESY spectrum of compound 7

1,8-Bis(hydroxymethyl)naphthalene (8)

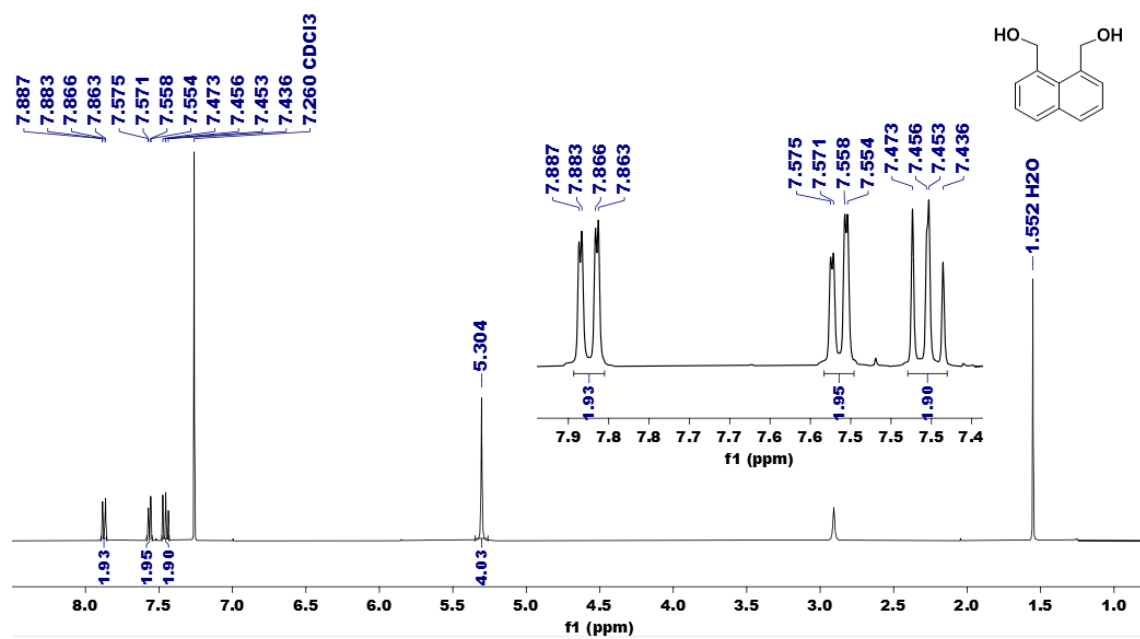

<sup>1</sup>H NMR (CDCl<sub>3</sub>, 400 MHz) of compound 8

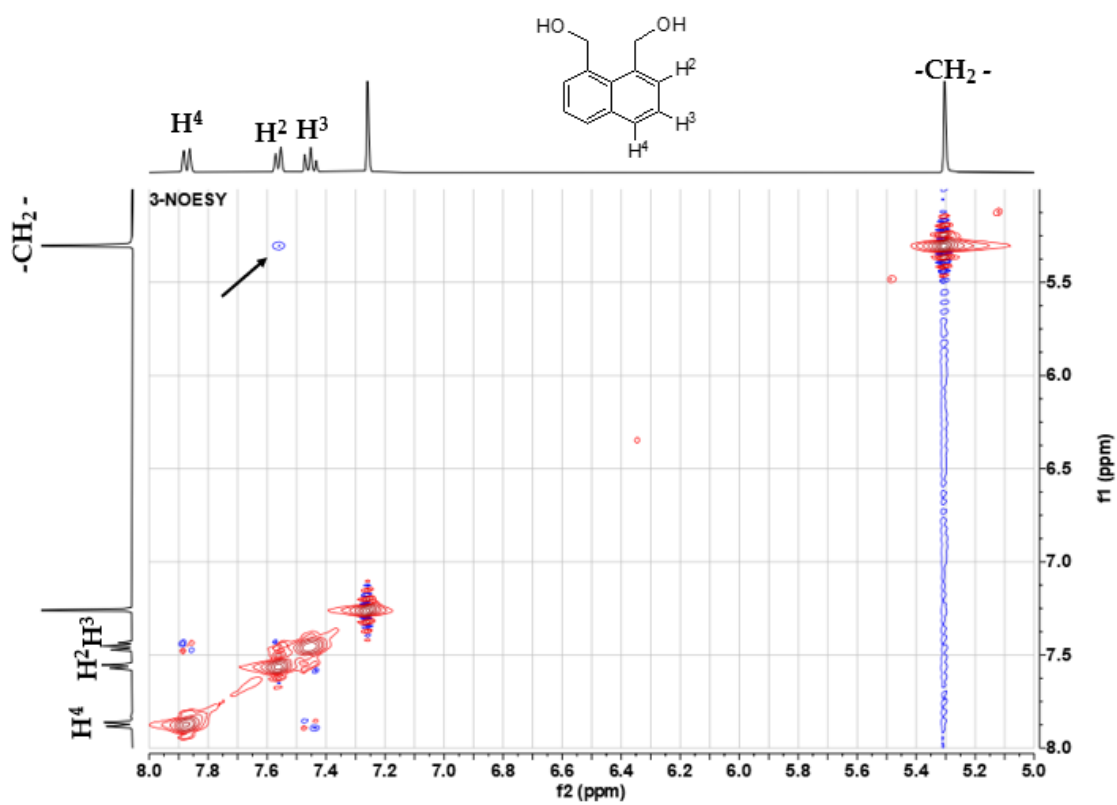

NOESY spectrum of compound 8

1,8-Bis(bromomethyl)naphthalene (9)

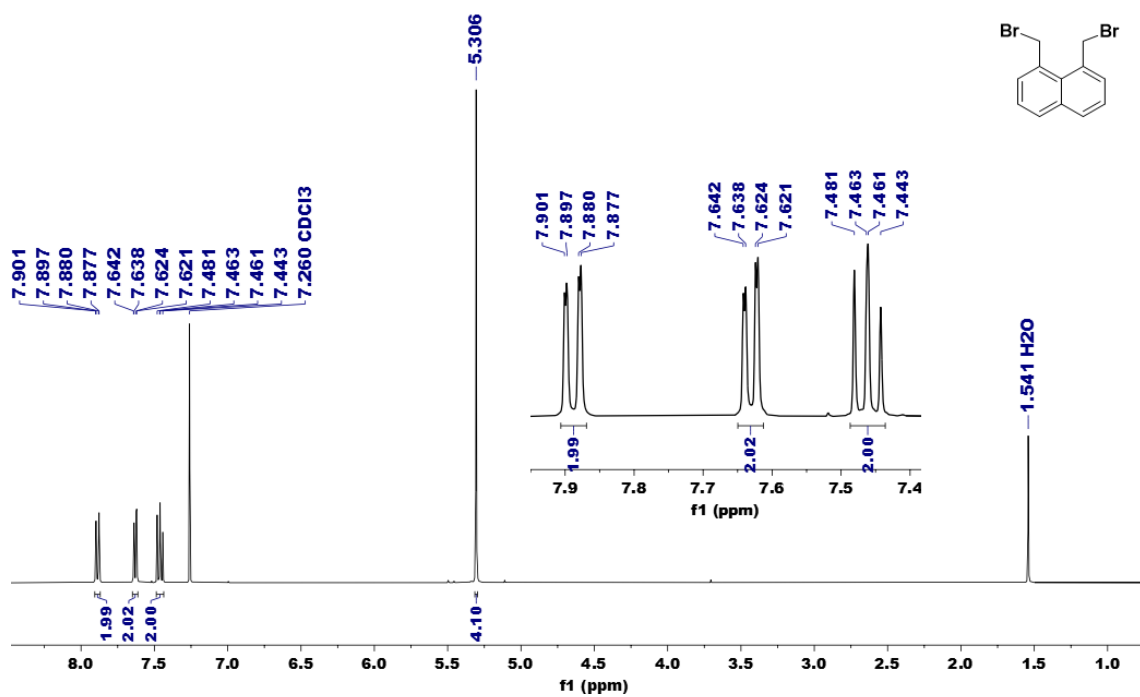

<sup>1</sup>H NMR (CDCl<sub>3</sub>, 400 MHz) of compound 9

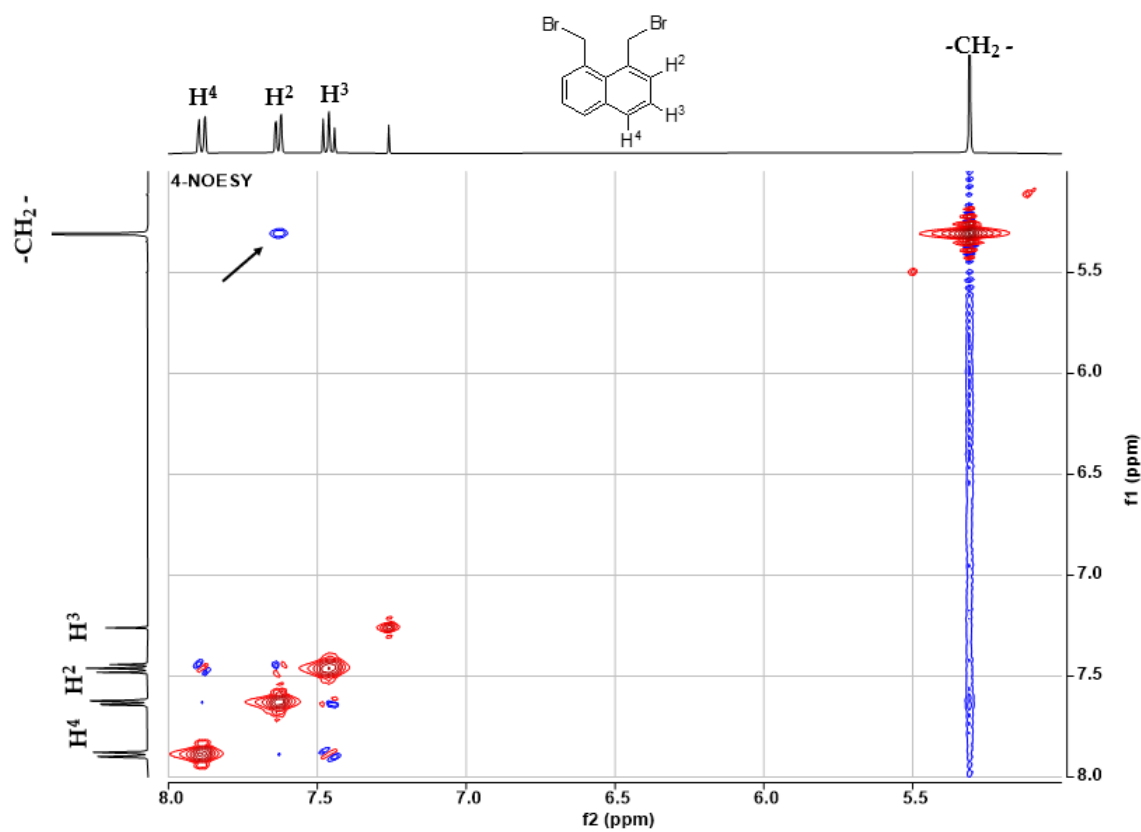

NOESY spectrum of compound 9

# 1,8-Bis(dibromomethyl)naphthalene (10)

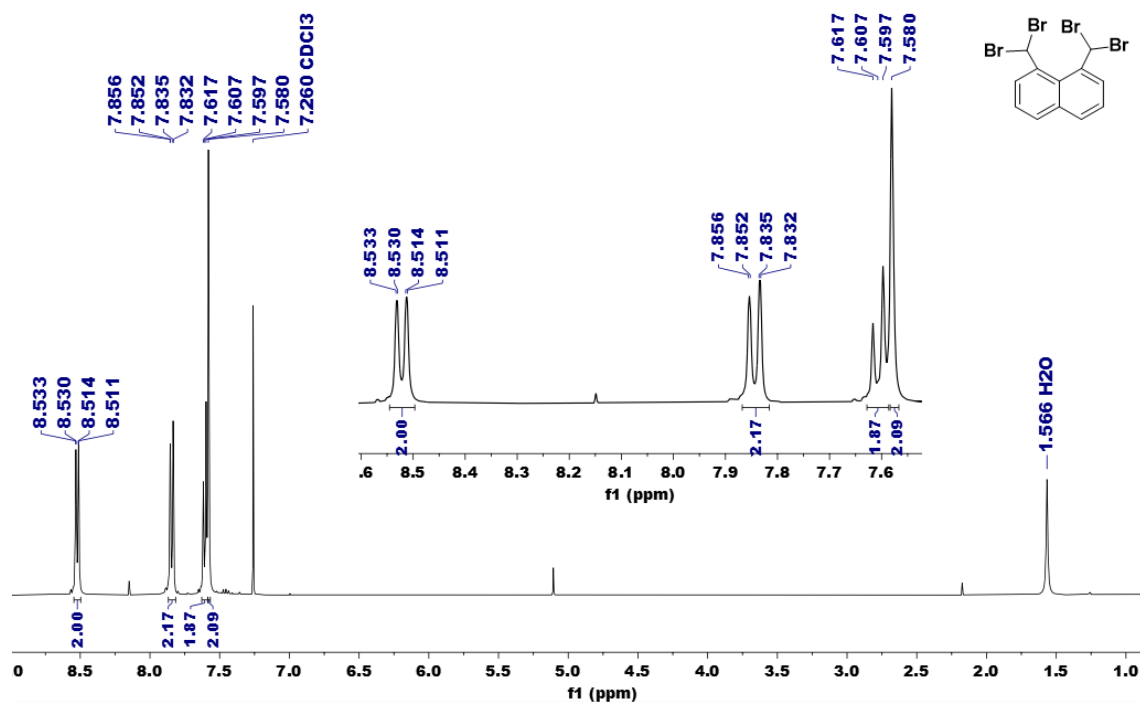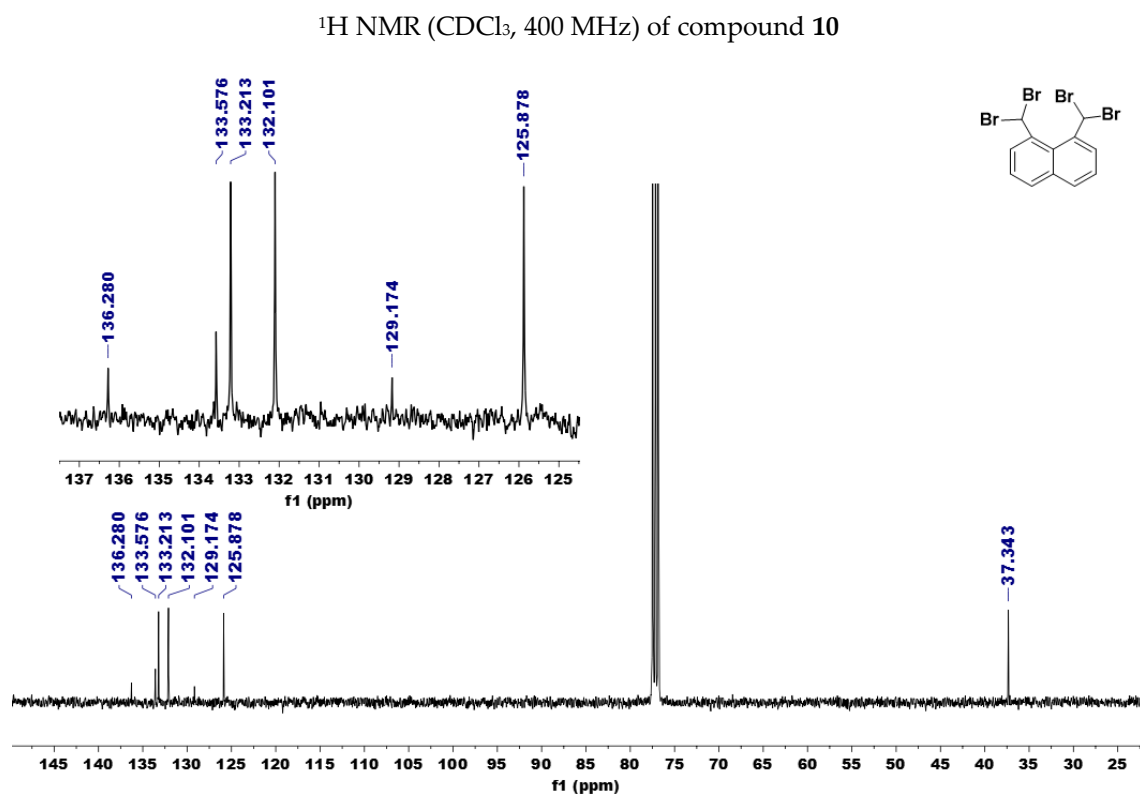

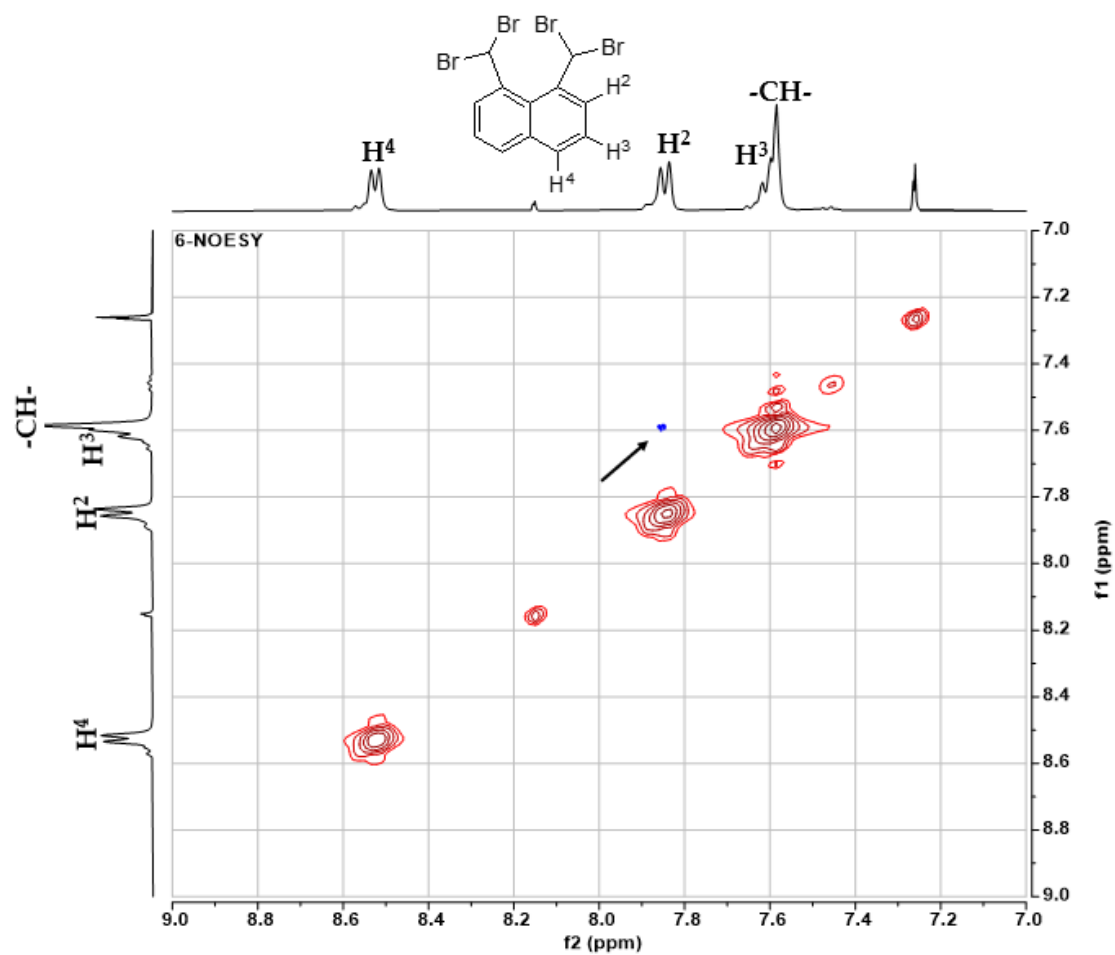

NOESY spectrum of compound 10

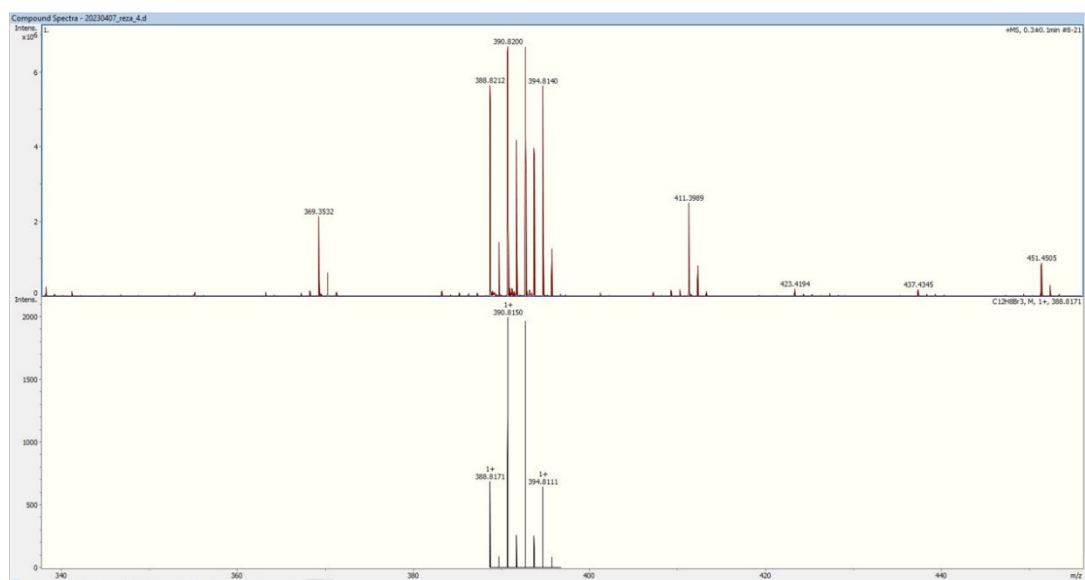

ACPI-MS spectrum of compound 10

### 1,8-Dimethyl-2-nitronaphthalene

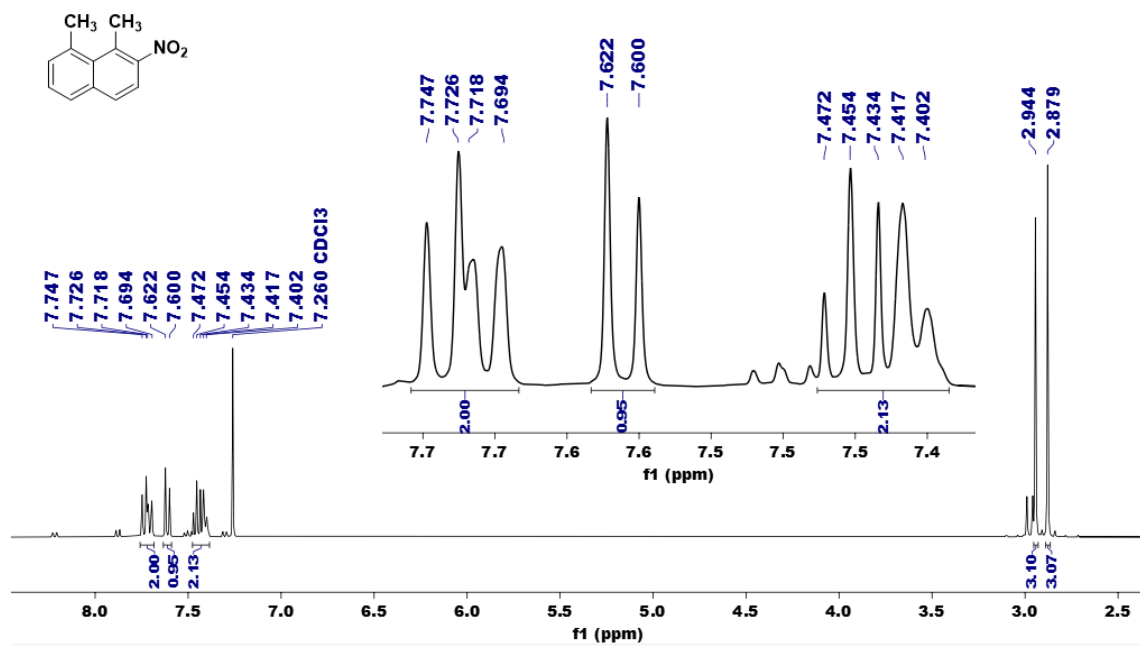

<sup>1</sup>H NMR (CDCl<sub>3</sub>, 400 MHz)

### 1,8-Dimethyl-4-nitronaphthalene

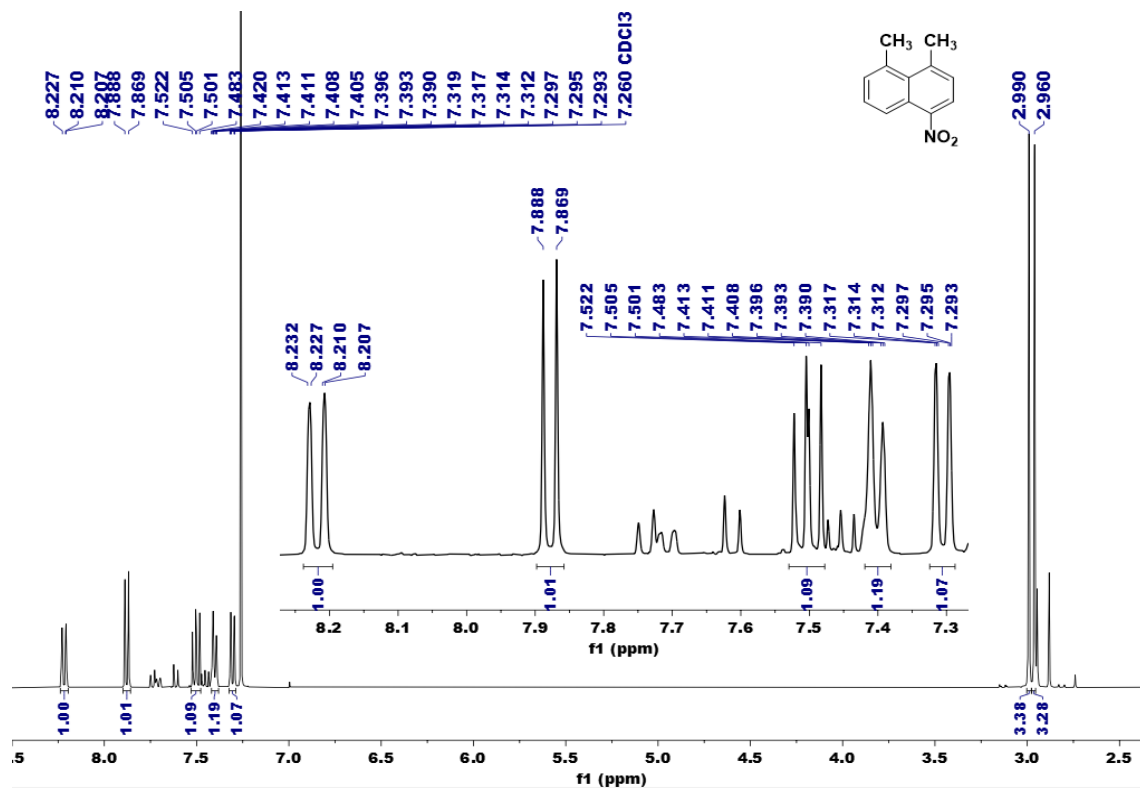

<sup>1</sup>H NMR (CDCl<sub>3</sub>, 400 MHz)

# 1,8-(Bisbromomethyl)-4-nitronaphthalene

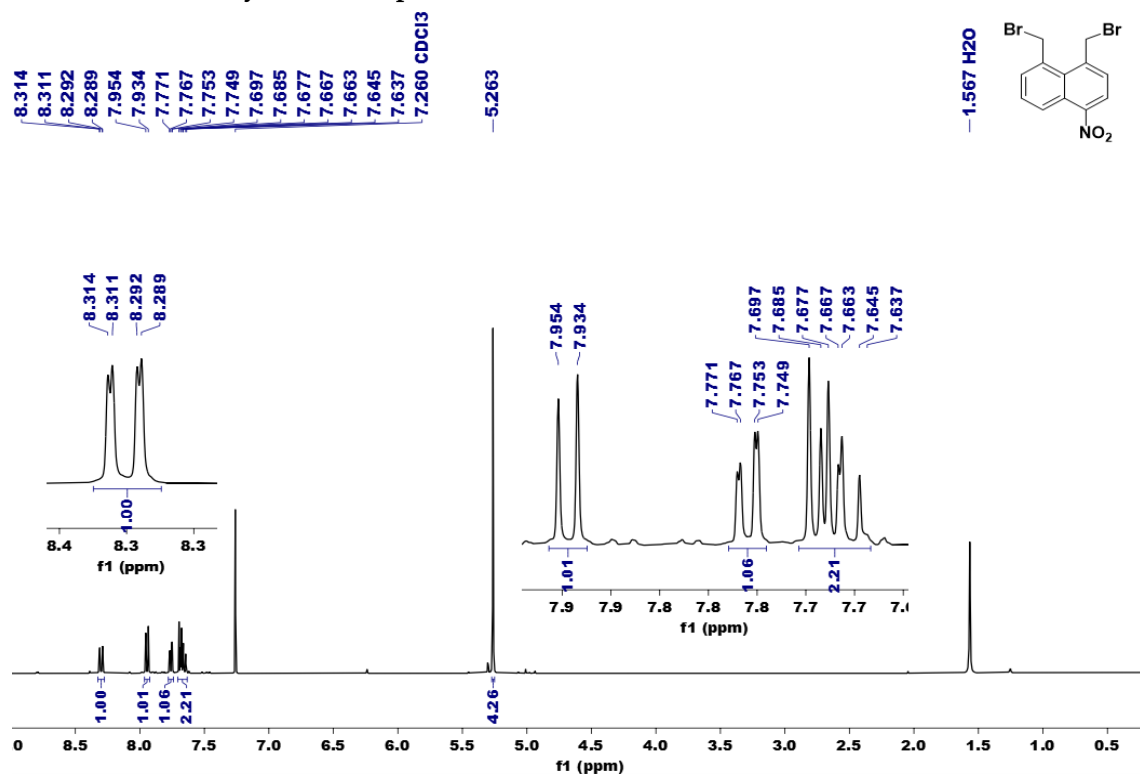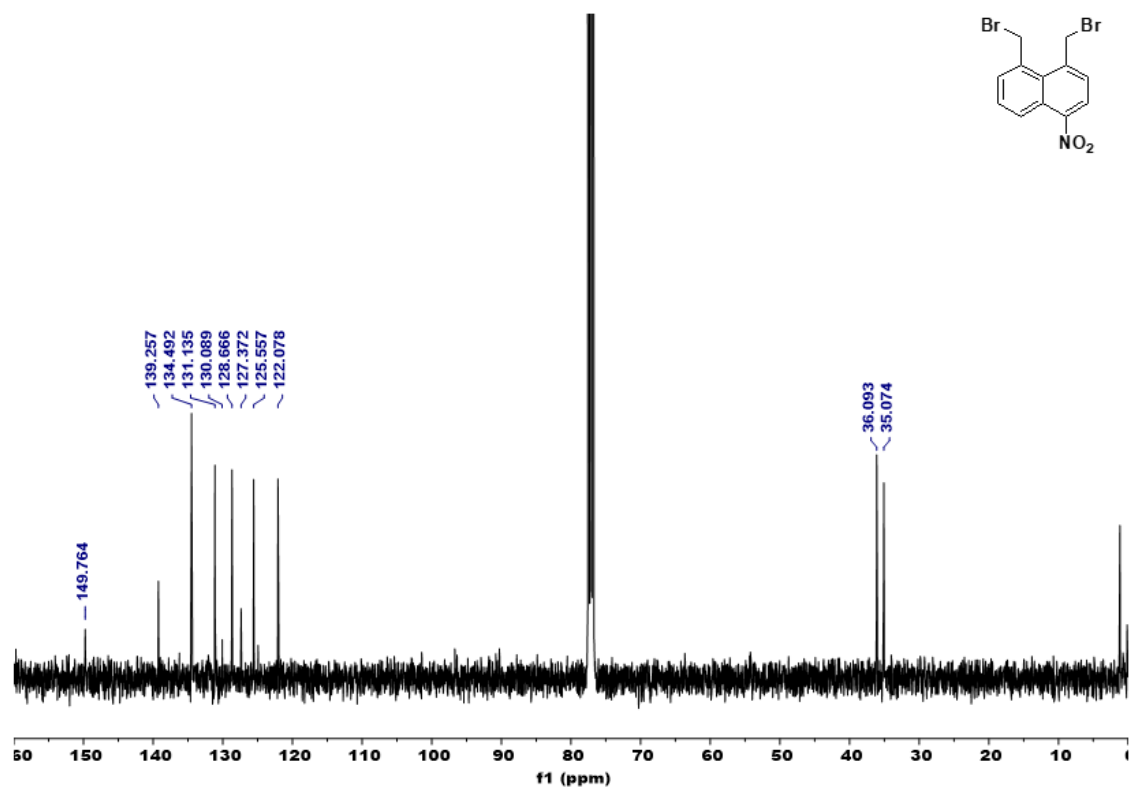

<sup>13</sup>C NMR (CDCl<sub>3</sub>, 100 MHz) of compound

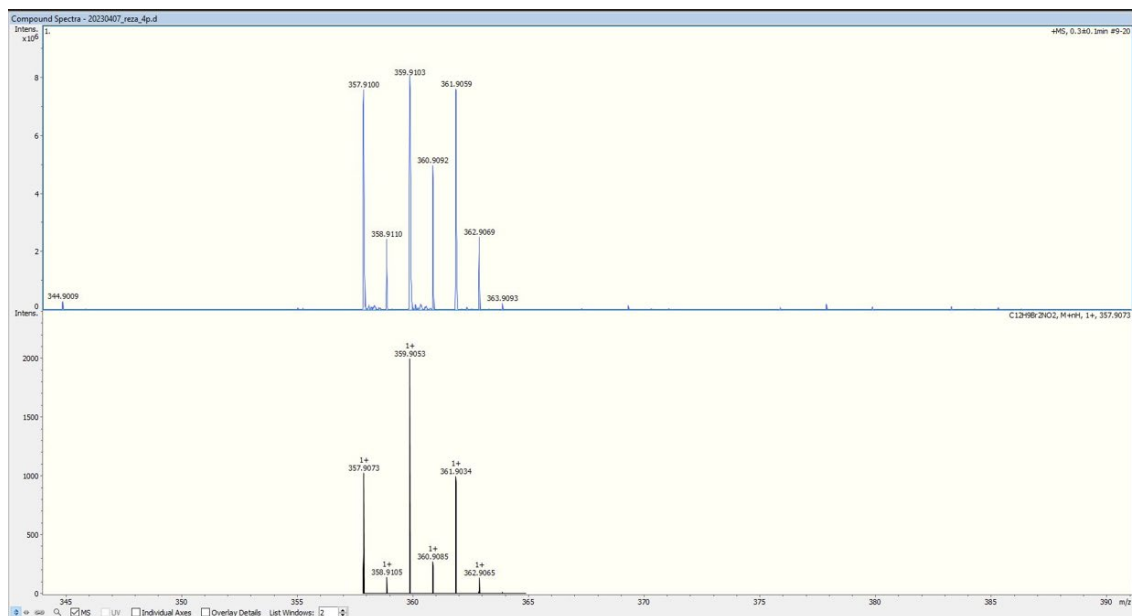

ACPI-MS spectrum of compound

NMR spectra of 1,8-disubstituted naphthalenes **7–10**

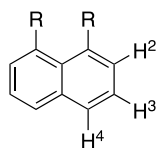

| Naphthalene        |           | Chemical shift/ppm |                |                |
|--------------------|-----------|--------------------|----------------|----------------|
| R                  |           | H <sup>2</sup>     | H <sup>3</sup> | H <sup>4</sup> |
| CH <sub>3</sub>    | <b>7</b>  | 7.31               | 7.23           | 7.67           |
| CH <sub>2</sub> OH | <b>8</b>  | 7.56               | 7.45           | 7.87           |
| CH <sub>2</sub> Br | <b>9</b>  | 7.63               | 7.46           | 7.89           |
| CHBr <sub>2</sub>  | <b>10</b> | 7.85               | 7.66           | 8.52           |
